# Anatomía Hidráulica de los Ojos del Guadiana (I)

## Hydraulic Anatomy of Guadiana Springs (I)

Doncel Fuentes, P. <sup>a1</sup>, Florín Beltrán, M. <sup>a2</sup>

<sup>a</sup> Universidad de Castilla la Mancha (UCLM), Centro Regional de Estudios del Agua (CREA), Ciudad Real, Spain.  
E-mail: <sup>a1</sup>pdoncel@hotmail.com, <sup>a2</sup>Maximo.Florin@uclm.es

Recibido: 30/09/2019

Aceptado: 08/07/2020

Publicado: 31/07/2020

**Citar como:** Doncel Fuentes, P., Florín Beltrán, M. 2020. Hydraulic Anatomy of Guadiana Springs (I). *Ingeniería del agua*, 24(3), 169-181. <https://doi.org/10.4995/ia.2020.12387>

---

## RESUMEN

El Río Guadiana nacía gracias al caudal sobrante del acuífero manchego occidental, recurso que era aprovechado en sus primeros cincuenta kilómetros por dieciséis molinos hidráulicos. Este conjunto industrial perduró hasta la segunda mitad del pasado siglo, cuando distintas obras de drenaje y desecación junto al agotamiento del acuífero, provocaron un yermo panorama donde agua y vida imperaron durante siglos. El primer objetivo de esta investigación independiente, desarrollada en la sección de humedales del CREA y en la Escuela de Caminos de la UCLM, es caracterizar el sistema hidráulico original a través de geo-historiografía y trabajos de campo integrados en un sistema de información geográfica, con el objeto de simular su hidrodinámica prístina con el modelo IBER bajo condiciones de avenida. Los resultados permitirán estimar la capacidad de carga hidráulica y de laminación de avenidas de los dieciséis azudes y molinos en operación en el siglo XVI, que servirán de escenario base para analizar el impacto de las obras de drenaje venideras. Estos parámetros son esenciales en cualquier proyecto de restauración fluvial orientado a recuperar el dominio público hidráulico histórico y mitigar los potenciales efectos del cambio climático.

**Palabras clave** | geo-historiografía; patrimonio; IBER; modelización de capacidad de carga hidráulica.

---

## ABSTRACT

*Guadiana River used to spring thanks to the Western Mancha Aquifer surplus flow, powering a set of sixteen watermills located along fifty kilometres of its upper reach. Such industrial hub lasted until the second half of last century, when drainage and drying-up works joined to aquifer overdraft, resulted in a distressing parched and scorched land where water and life had been dominant for centuries. The first target of this independent research, developed at the wetlands section of the Regional Centre Water Research and Civil Engineering Faculty (UCLM), is to characterize this ancient hydraulic system through geo-historiography and field works integrated in a Geographic Information System, to model that pristine hydrodynamics in IBER under flooding conditions. The expected results would assess the pristine hydraulic carrying capacity and flooding events management capacity of the sixteen weirs and watermills operating by 16<sup>th</sup> century, baseline to analyse further scenarios influenced by the drainage works to come. These parameters are essential to draft any fluvial restoration project focused on recovering that Hydraulic Public Domain and to mitigate the climate change potential effects.*

**Key words** | geo-historiography; heritage; IBER; hydraulic carrying capacity modelling.

## INTRODUCCIÓN

El más anómalo de los ríos peninsulares presenta en su tramo alto una morfología pantanosa, con cauce difuso sin pendiente pronunciada, donde emergía un caudal constante de agua cristalina (Hernández Pacheco, 1955). Esta zona privilegiada de la llanura manchega fue objeto de asentamiento humano al menos desde la Edad de Bronce, donde destacan los yacimientos arqueológicos de Los Toriles y Calatrava la Vieja (Urbina y Urquijo, 2017) que jalonan hasta dieciséis molinos hidráulicos alimentados por pequeñas presas (Figura 1).

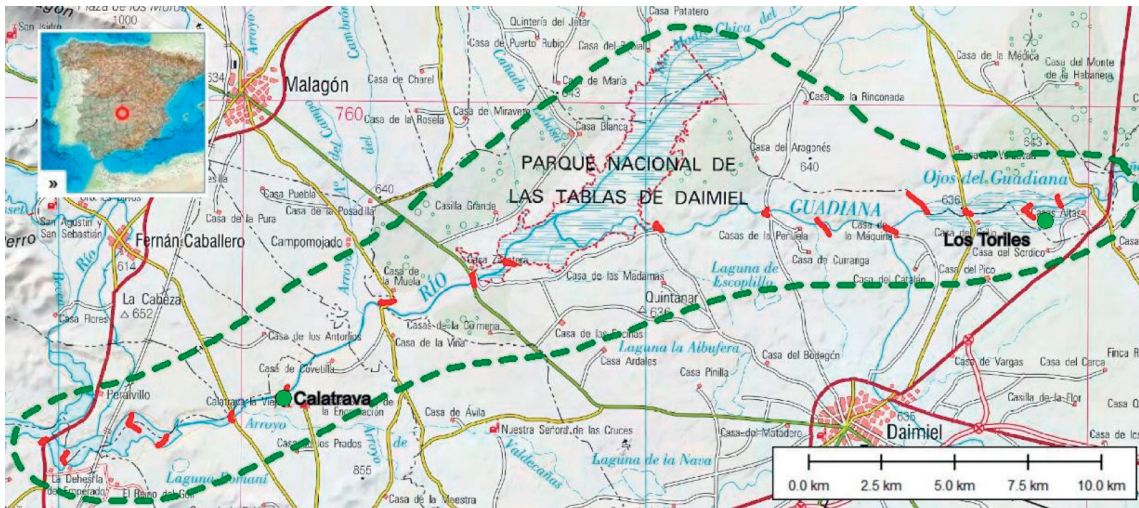

**Figura 1** | Zona de estudio sobre Mapa Topográfico Nacional 1:200.000 (MTN25 Raster; IGN ©, 2008).

Estos azudes se construyeron con arcilla y caliza local, presentando sección trapezoidal de pocos metros de altura y un trazado polivalente que dirigía el flujo hacia la casa de máquinas, sirviendo de aliviadero y paso entre orillas. Esta tipología híbrida entre pie de presa, derivación y fluyente (ICOLD, 2017), exhibe hasta cuatro configuraciones distintas en la zona de estudio (Figura 2). Arquitectónicamente, el edificio tipo se dispone con una estructura adintelada simple sobre muros de sillería o tapial, coronada por cubierta a dos aguas de teja curva, destacando las bóvedas de medio punto y tajamares que conforman los canales hidráulicos (Jérez García, 2005), destacando (8) Molemochó como el único molino rehabilitado en la actualidad (Figura 3).

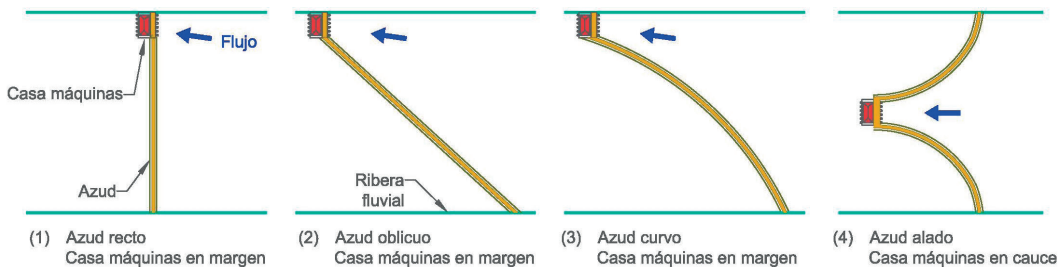

**Figura 2** | Tipología de azud asociado a molinos hidráulicos fluyentes o de ribera presentes en Los Ojos del Guadiana.

El origen de esta infraestructura es incierto, conservándose referencias castellanas del siglo XII cuando las huestes cristianas conquistan Calatrava. Sin embargo, la primera descripción cuasi completa del sistema se recoge a finales del siglo XVI, en las Relaciones Topográficas de Felipe II (Campos y Sevilla, 2009). Desde entonces, se constatan licencias de rehabilitación, así como denuncias y pleitos entre propietarios colindantes por afecciones o perjuicios en la operación de los molinos, especialmente durante inundaciones (Santos y Campo, 2009), que alimentaron la necesidad de regular el sistema. Problemática abordada por posteriores proyectos Ilustrados (ACGE, c. 1780), estableciendo límites en los niveles máximos de embalses por medio de aliviaderos, derribando azudes o incluso dragando el cauce.

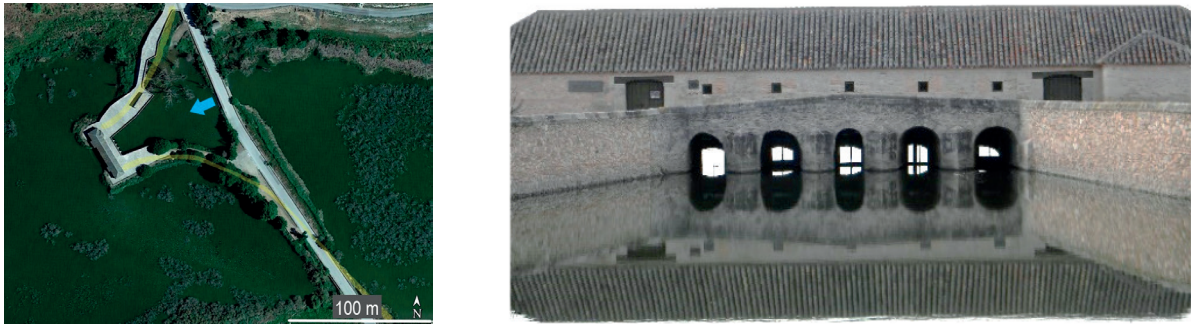

**Figura 3** | Imagen aérea de (8) azud alado y molino de Molemocho (Google Earth, 2016); Vista desde aguas arriba (2015).

Gran parte de los molinos han estado en funcionamiento hasta la segunda mitad del pasado siglo, cuando el Estado financió y ejecutó la canalización masiva del lecho y destrucción de todos los azudes. La maquinaria pesada obró en pocos meses el drenaje de la zona, pero la desecación completa acaeció años más tarde, cuando la sobreexplotación del acuífero por usos agrarios descontrolados provocó el cese de aporte de agua a través de los Ojos (BOP Ciudad Real, 1987).

Ante esta situación y en aras de recuperar la memoria de este sistema hidráulico, el primer objetivo es interpretar sus características físicas originales a través de geo-historiografía retrospectiva (Ruiz-Bellet et al., 2015), apoyada en cartografía y trabajos topográficos e interpretativos de campo, integrado en un sistema de información geográfica (GIS) (Figura 4).

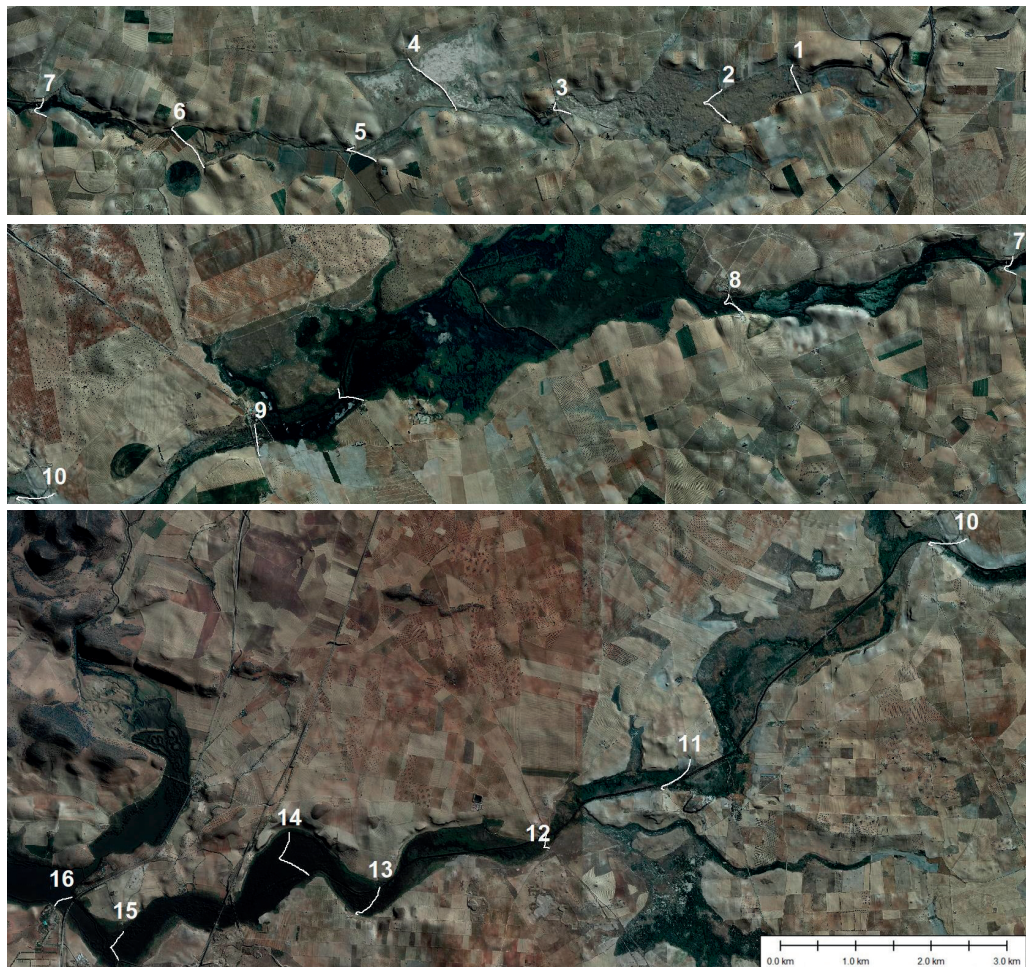

**Figura 4** | Geolocalización de azudes y molinos históricos sobre PNOA (MDT05-LIDAR; IGN ©, 2009).

Esta parametrización física definirá el modelo hidráulico bajo condiciones de avenida, situación más desfavorable para distinguir aquellas afecciones operativas entre molinos que definiría la capacidad de carga hidráulica del sistema, entendida como el máximo de aprovechamientos capaces de coexistir en un determinado espacio sin producir interferencias.

Por último, el modelo permitirá esbozar la capacidad de laminación del sistema prístino, a través de la máxima superficie inundada y volumen embalsado, que aportará evidencias para la recuperación del Dominio Público Hidráulico y su posible impacto hidrogeológico. Estableciendo la línea base para futuros escenarios que simularán el devenir hidráulico de los Ojos del Guadiana, actualmente en elaboración.

## MATERIALES Y MÉTODOS

### Interpretación y análisis de datos

Modelar la hidrodinámica prístina del Río Guadiana desde su nacimiento hasta la cola del actual embalse del Vicario, cuando los dieciséis molinos operaban antes de cualquier obra de desecación, precisa un análisis retrospectivo y multidisciplinar para construir una realidad aproximada de cinco siglos atrás. Los datos necesarios para estimar la morfología han sido obtenidos por medio de análisis de referencias descriptivas y actuaciones pasadas para establecer correlaciones entre cartografía histórica y actual, destacando:

- Relaciones Topográficas de Felipe II (Campos y Sevilla, 2009)
- Croquis del nacimiento del río Guadiana (AHN, 2015), datada hacia el s. XVI (Espinosa, 2015)
- Catastro de Ensenada, 1752 (Ilera, 1993)
- Mapa de las obras ejecutadas en el Río Guadiana para evacuar las inundaciones, escala 1:13.500 (ACGE, c. 1780)
- Itinerarios del Río Guadiana, 1883 (DGOP, 1883)
- Primera edición del mapa topográfico nacional (1887-1888), escala 1:50.000, hojas 759, 760 y 761 (IGN ©, 2008)
- Imágenes aéreas escala 1:32.000 (CEGET, 1956-1957)
- Mapa topográfico nacional, escala 1:25.000; (MTN25 Raster; IGN ©, 2008)
- Modelo Digital del Terreno (MDT05-LIDAR; IGN ©, 2009), cuya fecha de vuelo coincide con los cauces estudiados prácticamente secos, sirviendo de batimetría.
- Plan Nacional de Ortofotografía Aérea (PNOA; IGN ©, 2006-2015)
- Imágenes Aéreas de Google Earth, fechadas 2007, 2012 y 2016 (Google Earth, 2016)

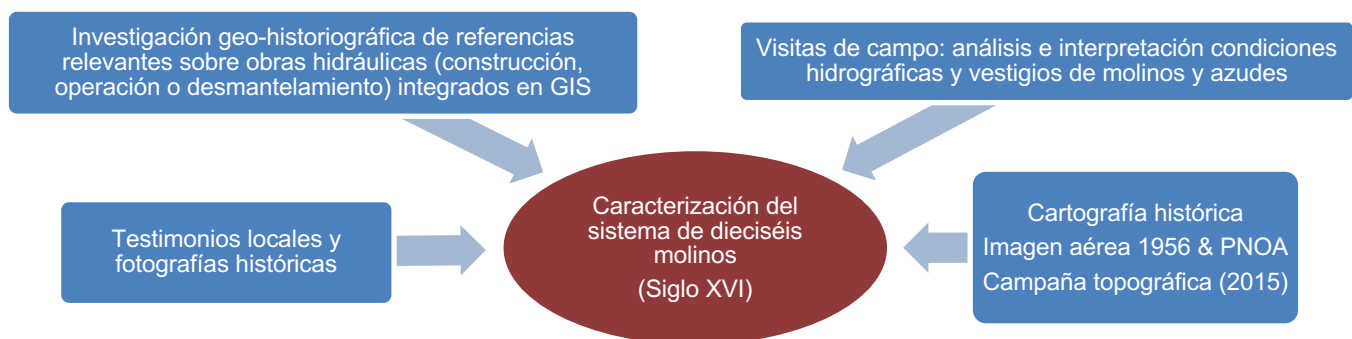

**Figura 5** | Proceso de recopilación e interpretación de datos para caracterización física del sistema.

Este proceso teórico es alimentado y validado a través de visitas de campo, campaña topográfica (Intedhor SL, 2015), testimonios locales (Sepúlveda Rodríguez, 2016) y fotografías previas a las obras de drenaje del pasado siglo (CIDAHM, 2018) (Figura 5), identificando cada uno de los aprovechamiento hidráulicos y parametrizando sus principales magnitudes físicas e hidráulicas (Figura 6; Tabla 1):

- Cota media coronación azud, obtenida por topografía y MDT.
- Cota media cauce, ídem.
- Altura media del azud: (a) – (b).
- Longitud de coronación del azud, según MDT e imagen aérea.
- Mínima distancia entre estribos del azud, ídem.
- Distancia mínima con azud inmediatamente aguas arriba, según eje principal cauce.
- Salto hidráulico disponible con embalses a máxima capacidad, con rango de valores entre 0.5 y 2.5 m (Figura 7).
- Coefficiente de forma del azud: (d)/(e), relaciona la longitud de éste con la distancia mínima entre estribos, indicando su grado de curvatura en planta y eficiencia hidráulica en la derivación de flujo hacia la casa de máquinas. Valores  $>1.2$  indica planta curva (Figura 2; tipología (3) y (4)) con líneas de corriente óptimas y mínima pérdida de carga; mientras  $<1.2$  revelan azud recto (tipología (1) y (2)) de construcción más simple pero menos eficiente.
- Número de vanos del molino según descripción de las Relaciones Topográficas. Distinguiendo (X,Y). X representa el número de piedras harineras, asumidas como tipo regolfo; Y, aceñas-batanes como ruedas verticales. Excepto (1) Zorreras, citado como Batán del Conde de Salinas (Dadson, 2007); además de (15) Emperador y (16) Puente Nolaya según (Melero Cabañas, 2014).

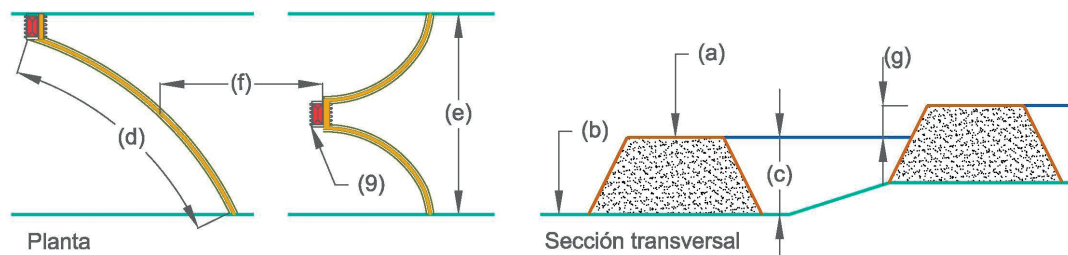

**Figura 6** | Principales parámetros de caracterización física del azud.

Partiendo del MDT, se ha asumido como hipótesis general que las elevaciones relativas prístinas se asemejan a la actual y que cualquier efecto de consolidación de terreno hubiera afectado globalmente a todo el sistema de manera análoga. La excepción la encontramos aguas arriba de (3) Zuacorta, donde la subsidencia provocada por los incendios subterráneos de turba de las últimas décadas ha afectado notablemente las características del terreno, por lo que se ha optado por añadir dos metros a las cotas obtenidas de (1) Zorreras y (2) Arquel para así proporcionar un sistema hidráulico coherente (Figura 7).

Además, se ha eliminado cualquier traza de obras de canalización y las presas ejecutadas en la segunda mitad del pasado siglo: Morenillo y “nuevo” Puente Navarro, situados entre (8) y (9), interpretando la morfología según fotografía aérea previa (CEGET, 1956-1957). El siguiente paso ha sido revertir las obras ilustradas, descritas en el mapa de actuaciones (ACGE, c. 1780) e identificadas por analogía constructiva para el tramo yuso (9) Puente Navarro, obviando la limitación de nivel máximo de operación interpuesto por los aliviaderos y restituyendo los azudes derribados, según la descripción de molinos en operación del s. XVI.

Por último, destaca la presencia de un azud curvo situado a 1500 m aguas arriba de (9) Puente Navarro, que pudiera corresponderse con La Quebrada del molino de Gaspar Rótulo (Figura 4), cuya operación se limitaría a la primera mitad del s. XVI (Almagro Vidal, 2016). La obra no ha podido ser reconocida en campo por inaccesibilidad y según MDT-LIDAR presenta una cota máxima inferior a 606.5 msnm, quedando totalmente sumergido por (9) Puente Navarro y excluido del modelo.

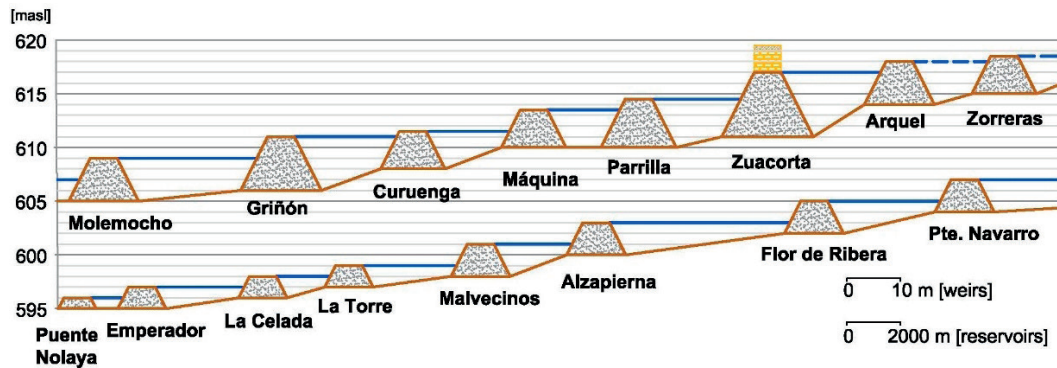

Figura 7 | Perfil longitudinal del sistema a embalse lleno.

Tabla 1 | Características físicas principales de los aprovechamientos.

| #  | Molino-Azud  | (a) [msnm] | (b) [msnm] | (c) [m] | (d) [m] | (e) [m] | (f) [m] | (g) [m] | (h) | (i)        |
|----|--------------|------------|------------|---------|---------|---------|---------|---------|-----|------------|
| 1  | Zorreras     | 618.5      | 615.0      | 3.5     | 430     | 400     | -       | 0.5     | 1.1 | n/d (0;2)? |
| 2  | Arquel       | 618.0      | 614.0      | 4.0     | 800     | 480     | 1200    | 1.0     | 1.7 | 2 (2;0)    |
| 3  | Zuacorta     | 617.0      | 612.0      | 5.0     | 400     | 300     | 1900    | 2.5     | 1.3 | 2 (2;0)    |
| 4  | Parrilla     | 614.5      | 611.0      | 3.5     | 1010    | 920     | 1700    | 1.0     | 1.1 | 3 (3;0)    |
| 5  | Máquina      | 613.5      | 610.0      | 3.5     | 535     | 370     | 1300    | 2.0     | 1.4 | 2 (2;0)    |
| 6  | Curuenga     | 611.5      | 608.0      | 3.5     | 740     | 690     | 2100    | 0.5     | 1.1 | 4 (4;0)    |
| 7  | Griñón       | 611.0      | 606.0      | 5.0     | 410     | 270     | 2200    | 2.0     | 1.5 | 5 (5;0)    |
| 8  | Molemocho    | 609.0      | 605.0      | 4.0     | 400     | 290     | 3800    | 2.0     | 1.4 | 4 (4;0)    |
| 9  | Pte. Navarro | 607.0      | 603.0      | 4.0     | 440     | 420     | 6600    | 2.0     | 1.0 | 5 (4;1)    |
| 10 | Flor Ribera  | 605.0      | 602.0      | 3.0     | 450     | 440     | 3400    | 2.0     | 1.0 | 5 (2;3)    |
| 11 | Alzapierna   | 603.0      | 600.0      | 3.0     | 670     | 570     | 5900    | 2.0     | 1.2 | 3 (0;3)    |
| 12 | Malvecinos   | 601.0      | 598.0      | 3.0     | 350     | 275     | 2100    | 2.0     | 1.3 | 2 (0;2)    |
| 13 | La Torre     | 599.0      | 597.0      | 2.0     | 570     | 480     | 2900    | 1.0     | 1.2 | 2 (0;2)    |
| 14 | La Celada    | 598.0      | 596.0      | 2.0     | 850     | 630     | 1400    | 1.0     | 1.3 | 2 (0;2)    |
| 15 | Emperador    | 597.0      | 595.0      | 2.0     | 560     | 470     | 2700    | 1.0     | 1.2 | 3 (3;0)    |
| 16 | Pte. Nolaya  | 596.0      | 595.0      | 1.0     | 410     | 340     | 930     | 1.0     | 1.2 | 3 (3;0)    |

## Modelo hidráulico

El modelo bidimensional será construido con IBER (Bladé et al., 2014), bajo el módulo hidrodinámico basado en la resolución de las ecuaciones de St. Venant, ampliamente aplicado a zonas inundables análogos al estado prístino de los ojos del río Guadiana. Para facilitar la imposición de las condiciones internas y de contorno, el dominio es sectorizado siguiendo la coronación de los azudes y el área potencialmente inundable asociada al máximo embalse (Figura 8).

Las condiciones internas se definen por la cota de coronación de azudes, habilitados como vertederos de labio fijo en toda su longitud ( $C_d=1.7$ ), mientras los canales o vanos que accionaban las ruedas han sido modelados como compuertas completamente abiertas hasta cota cauce, con un ancho equivalente de 1.5 m por unidad ( $C_d \text{ libre}=0.6$ ;  $C_d \text{ anegado}=0.8$ )

Las condiciones de contorno de caudal entrante deben asemejarse a la hidrología prístina, condiciona por el rol del vasto acuífero subyacente, cuya surgencia por Los Ojos era más que suficiente para mover los molinos (Madoz, 1850). Este caudal fue aforado en junio de 1854 en 4 m<sup>3</sup>/s aguas arriba de (3) Zuacorta (Castro González, 1854), análogo a los registrados en la estación 4909 durante 1914-1941 (SIAA, 2018), corroborando la característica de flujo cuasi constante (Gray, 2005) hasta su extinción en

1987. Aguas abajo de (5) Máquina confluye el río Azuer, con registros desde 1948 en Daimiel (4102); Río Cigüela, desembocando yuso (8) Molemocho formando un área palustre de alto valor ecológico hoy conocido como el Parque Nacional de las Tablas de Daimiel, con datos disponibles en 1918-1946 y 1993-2015 en Villarrubia (4904).

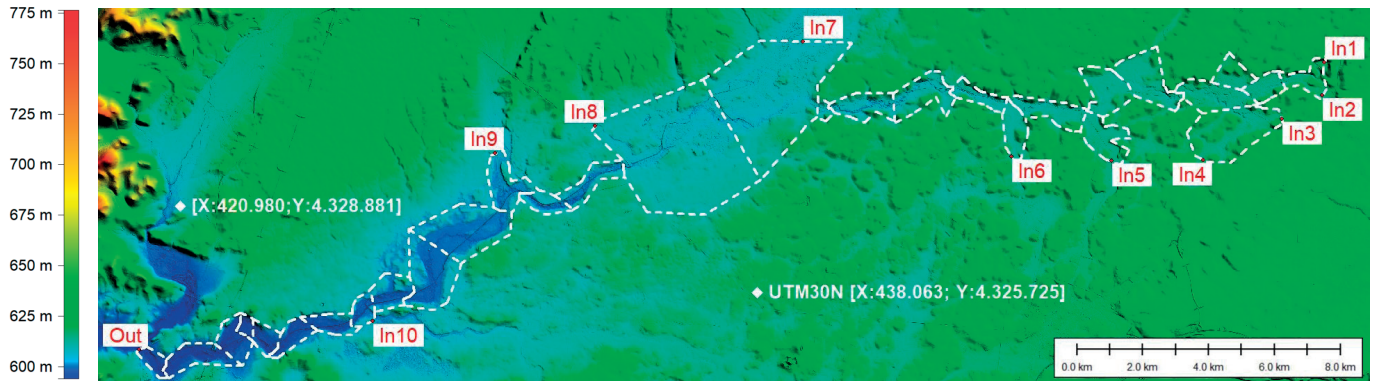

**Figura 8** | Caracterización del dominio hidráulico sobre MDT-LIDAR.

Aunque la calidad de estos datos es baja, para satisfacer el objeto del modelo se estima suficiente aplicar el método tradicional de análisis de avenidas de inundación (Gumbel, 1958) a los registros anteriores a la sobreexplotación del acuífero, escogiendo el correspondiente a un periodo de retorno de 500 años y con resultados análogos a los oficiales (CEDEX, 2014). Para el resto de subcuencas se ha aplicado el método racional, resultando en: 28 m<sup>3</sup>/s en (3) Zuacorta, distribuidos en los cuatro Ojos principales situados aguas arriba (In1=8 m<sup>3</sup>/s; In2=6 m<sup>3</sup>/s; In3=6 m<sup>3</sup>/s; In4=8 m<sup>3</sup>/s); 21 m<sup>3</sup>/s para río Azuer (In5); 3 m<sup>3</sup>/s arroyo Navaseca (In6); 60 m<sup>3</sup>/s para río Cigüela (In7) y 3 m<sup>3</sup>/s arroyo La Leona (In8) que confluyen aguas arriba de (9) Puente Navarro; 3 m<sup>3</sup>/s para arroyos de Cambrón (In9) y Valdecañas (In10), sumando un influjo total simultáneo y permanente al sistema de 121 m<sup>3</sup>/s (Figura 8). Definiendo la condición de contorno de salida (Out) como vertedero en la coronación del azud de (16) Puente Nolaya.

Finalmente, las condiciones iniciales se establecen por el nivel normal de embalse, medio metro por debajo de la correspondiente cota de coronación. La rugosidad de cauce se define con coeficiente “n” de Manning para todo el dominio de 0.03, correspondiente a cursos en planicies sin cultivos (Chow, 1959). La malla se define con un máximo tamaño de celda no estructurada de 40 m, ajustada automáticamente por el modelo en las inmediaciones de la geometría definida (Figura 9), alcanzando  $8.48 \cdot 10^4$  elementos triangulares y cuya elevación es asignada desde el MDT antes definido. El esquema numérico escogido es de primer orden (CFL 0.45, con límite seco-mojado 0.01 m), definiendo un tiempo de simulación bajo régimen permanente de 3.5 días y mostrando resultados cada hora.

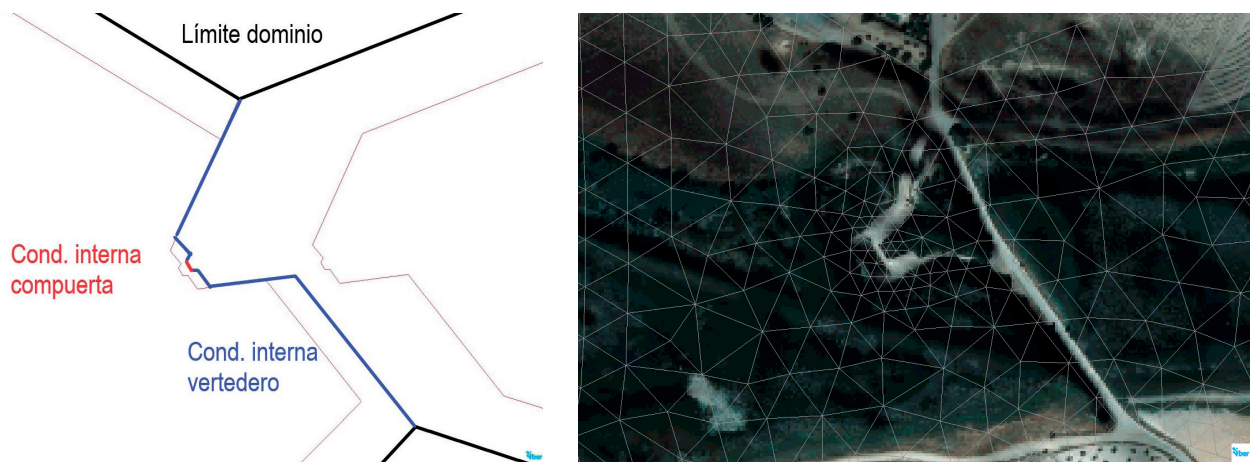

**Figura 9** | Detalle pre-proceso: definición geométrica (izq); mallado resultante en la zona de (8) Molemocho sobre PNOA (dcha).

## RESULTADOS

La simulación parte de un volumen inicial de 32.3 hm<sup>3</sup> ha, precisando un total de 48 horas para alcanzar el punto de equilibrio estacionario, llegando hasta 43.7 hm<sup>3</sup>. En este instante, la distribución de cota de lámina de agua se ve incrementada respecto a las condiciones iniciales a partir de (9) Puente Navarro, generalizándose el vertido por aliviadero con calados hasta 40 cm en (12) Malvecinos y (16) Puente Nolaya. En cambio, los aprovechamientos aguas arriba, salvo (5) Máquina, son capaces de gestionar el influjo a través de los canales de molienda, quedando cierto resguardo hasta cota de coronación (Tabla 2; Figura 10).

**Tabla 2** | Principales resultados hidráulicos.

| #  | Molino-Azud  | Superficie inundada coronación [ha] | Volumen embalse avenida [hm <sup>3</sup> ] | Cota aguas arriba [msnm] | Calado vertido aliviadero [m] | Resguardo [m] |
|----|--------------|-------------------------------------|--------------------------------------------|--------------------------|-------------------------------|---------------|
| 1  | Zorreras*    | 32.3                                | 1.1                                        | 616.8                    | -                             | 1.7           |
| 2  | Arquel*      | 51.4                                | 2.2                                        | 616.5                    | -                             | 1.5           |
| 3  | Zuacorta     | 251.4                               | 8.4                                        | 616.4                    | -                             | 0.6           |
| 4  | Parrilla     | 110.9                               | 2.5                                        | 614.0                    | -                             | 0.5           |
| 5  | Máquina      | 89.5                                | 1.3                                        | 613.6                    | 0.1                           | -             |
| 6  | Curuenga     | 120.7                               | 1.0                                        | 611.0                    | -                             | 0.5           |
| 7  | Griñón       | 69.0                                | 1.6                                        | 609.9                    | -                             | 1.1           |
| 8  | Molemocho    | 106.7                               | 3.5                                        | 608.0                    | -                             | 1.0           |
| 9  | Pte. Navarro | 699.1                               | 10.1                                       | 607.3                    | 0.3                           | -             |
| 10 | Flor Ribera  | 100.9                               | 2.3                                        | 605.2                    | 0.2                           | -             |
| 11 | Alzapierna   | 434.8                               | 6.7                                        | 603.1                    | 0.1                           | -             |
| 12 | Malvecinos   | 65.9                                | 0.8                                        | 601.4                    | 0.4                           | -             |
| 13 | La Torre     | 89.7                                | 0.8                                        | 599.2                    | 0.2                           | -             |
| 14 | La Celada    | 50.1                                | 0.5                                        | 598.2                    | 0.2                           | -             |
| 15 | Emperador    | 107.6                               | 0.7                                        | 597.3                    | 0.3                           | -             |
| 16 | Pte. Nolaya  | 22.5                                | 0.1                                        | 596.5                    | 0.4                           | -             |

Una peculiaridad es el orden milimétrico de la diferencia de cota de agua a lo largo de cada uno de los embalses bajo condiciones de avenida, presentando una curva de remanso “plana”, por lo que el salto hidráulico disponible bajo condiciones de avenida será análogo al “estático”, deduciendo la sobreelevación de la lámina vertiente sobre coronación registrada en los aprovechamientos aguas abajo de (9) Puente Navarro.

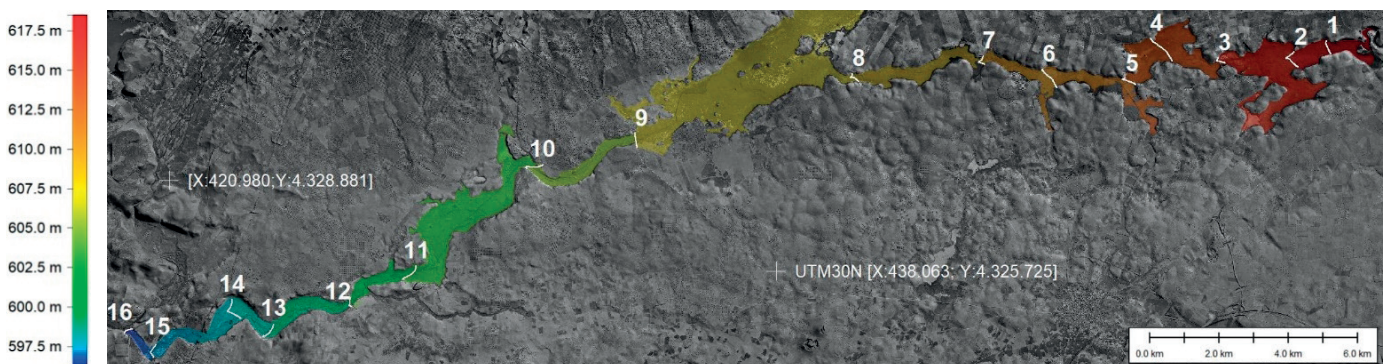

**Figura 10** | Máxima cota de inundación sobre imagen aérea más antigua disponible (CEGET, 1956-1957).

En cuanto la distribución de velocidades de flujo, alcanza 1.5 m/s en los canales de toma de los molinos aguas arriba de (8) Molemocho y 2 m/s aguas abajo. En los tramos situados entre los activos hidráulicos se forman canales de descarga preferentes con velocidades medias hasta 0.2 m/s, disminuyendo por debajo de 0.1 m/s en tramos con mayor anchura de cauce, como las confluencias con Cigüela (actuales Tablas de Daimiel) y yuso (11) Alzapierna, donde desemboca el Arroyo de Navaseca. A partir



de este tramo, la velocidad de flujo asciende a 0.5 m/s debido al estrechamiento del cauce y la circulación de la totalidad de aportes al sistema (Figura 11).

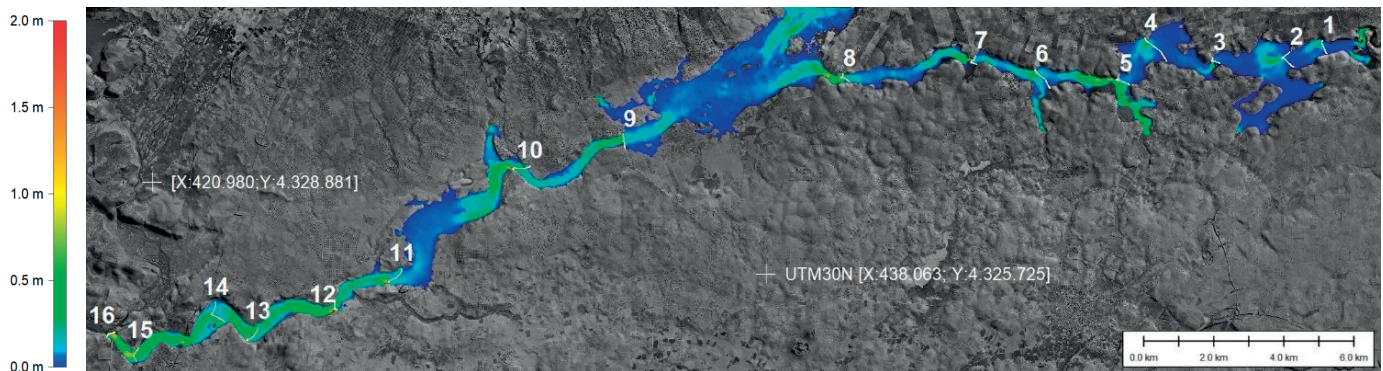

Figura 11 | Máxima velocidad de flujo sobre imagen aérea más antigua disponible (CEGET, 1956-1957).

## DISCUSIÓN

En primer lugar, los resultados de la caracterización física del sistema nos permiten evaluar la capacidad de carga hidráulica del sistema, determinada por el salto hidráulico mínimo necesario para accionar la maquinaria hidráulica industrial instalada en cada aprovechamiento, habiéndose demostrado el efecto de curva de remanso plano en condiciones de avenida. Generalmente, la tipología de piedra molinera descrita en el tramo alto hasta (10) Flor de Ribera se correspondería con rueda de eje vertical tipo regolfo (Jérez García, 2005), maquinaria que precisa alrededor de 1.5 metros de salto para un correcto funcionamiento hidromecánico, de acuerdo a la medición realizada en (3) Zuacorta en Junio de 1854. En cambio, en el siguiente tramo hasta (14) Emperador, la maquinaria existente serían ruedas verticales de tipo aceña de eje horizontal, que también energizaba a ciertos batanes anejos a los de regolfo, requiriendo un salto ligeramente inferior de al menos un metro, pero mayor caudal específico.

Por lo tanto, asumiendo que el caudal cuasi-permanente surgente por los Ojos era suficiente para energizar la maquinaria, el salto mínimo de un metro para aceñas y medio metro más para regolfo sería el factor limitante en la operación de los elementos del sistema. Bajo condiciones hidrológicas normales con embalses a máxima capacidad (Figura 7), estos saltos mínimos no se podrían satisfacer en un tercio de los molinos: (1) Zorreras, (2) Arquel, (4) Parrilla, (6) Curuenga, (15) Emperador y (16) Puente Nolaya.

De este modo, se pone de manifiesto que el sistema ya operaba a finales del s. XVI por encima de sus capacidades hidráulicas, origen de las luchas y pleitos entre propietarios colindantes (Santos y Campo, 2009). Aquellos molinos con insuficiente salto necesitaban que el embalse aguas abajo disminuyera su cota para poder operar dentro de su rango de funcionamiento, acción no deseada por el último ya que afectaba su propio salto disponible y capacidad de molienda.

El salto hidráulico normal en el sistema es inferior a 2 m, salvo en (3) Zuacorta, apto para energizar tanto ruedas de regolfo o aceñas. No obstante, (Celis Pozuelo et al., 2019) apuntan que la maquinaria prístina en el tramo alto se correspondería a ruedas de eje vertical tipo rodezno, tipología que demanda un mayor salto, solamente alcanzable por (3) Zuacorta de acuerdo a la geomorfología de cauce presentada.

En segundo lugar, destaca la particular relación entre tipología de azud y salto hidráulico disponible: 1) Zorreras, (4) Parrilla, (6) Curuenga, (15) Emperador y (16) Puente Nolaya tiene un coeficiente de forma igual o inferior a 1.2 y salto insuficiente, siendo la excepción (2) Arquel, que presenta la mayor curvatura en planta. Mientras el resto, salvo (9) Puente Navarro y (10) Flor de Ribera con planta rectilínea y salto de 2 m, presentan un coeficiente de forma mayor o igual a 1.2 y salto hidráulico suficiente, pudiendo inferir que la implantación de azudes curvos en los emplazamientos más favorables respondía a un proyecto prístino de conjunto, y que aquellos con tipología recta fueron construidos *a posteriori* desestabilizando el buen funcionamiento del sistema.

Siguiendo con los resultados del modelo, podemos evaluar la resiliencia frente a inundaciones entendida como el resguardo disponible en condiciones estacionarias de avenida, existiendo dos grupos bien diferenciados por la particular hidrología de la zona. Aguas arriba de la confluencia del Río Cigüela, el más irregular y con mayor caudal de avenida, todos los aprovechamientos, salvo (5) Máquina, eran capaces de gestionar los caudales circulantes a través de los propios canales de molienda. Sin embargo, una vez incorporado este afluente, todos los azudes precisarían de vertido por coronación para aliviar el caudal de avenida, poniendo en peligro la integridad de las edificaciones anejas e impidiendo el tránsito por coronación.

Aunque los azudes no fueron originariamente diseñados para almacenar agua, sino para proporcionar el salto hidráulico demandado por la maquinaria molinera e industrial, el volumen total del sistema con lámina de agua medio metro bajo coronación es  $32.3 \text{ hm}^3$  inundando un total de 2086 ha. El volumen máximo en el instante de equilibrio estacionario de avenida se incrementaría en un tercio hasta alcanzar  $43.7 \text{ hm}^3$ , con una superficie inundada de 2796 ha. Así, el calado medio de agua a lo largo del sistema se sitúa en 1.8 m, evidenciando las características palustres del tramo alto del Río Guadiana, que deberían formar parte del Dominio Público Hidráulico de acuerdo a la normativa actual (BOE, 2018).

La capacidad de regulación del sistema es análoga a la del actual embalse del Vicario,  $32 \text{ hm}^3$ , localizada en el límite Oeste del sistema y construida en 1973 (CHG, 2018). Entre la capacidad de embalse destacan los  $10 \text{ hm}^3$  de (9) Puente Navarro, (3) Zuacorta con  $8 \text{ hm}^3$ , (11) Alzapierna con  $6.7 \text{ hm}^3$  y (8) Molemocho con  $3.5 \text{ hm}^3$ . Tales volúmenes unidos a alturas de presa sobre cimientos de al menos 5 metros, definiría a estos cuatro azudes como “grandes presas” (ICOLD, 2011).

Por lo tanto, este sistema de azudes en cascada formaba un auténtico atenuador de inundaciones agua abajo, capaz de laminar gradualmente avenidas con periodo de retorno de hasta 500 años y con duración estacionaria de hasta dos días, presentando velocidades de flujo inferiores a 0.5 m/s. Incluso con la debida operación de los órganos de alivio de los azudes, se vería notablemente incrementada la capacidad mitigadora del sistema frente a eventos hidrológicos extremos, cuya concurrencia en el futuro será más frecuente. De hecho, en la Mancha se prevé que la precipitación atmosférica pueda disminuir hasta un 20% presentando una mayor irregularidad en los episodios lluviosos, tanto en incidencia temporal como distribución espacial, conllevando unas sequías más severas y duraderas interrumpidos por lluvias esporádicas torrenciales (CEDEX, 2012).

Por último, indicar que la sobreelevación del nivel de agua inducido por los azudes incide de manera análoga en el nivel freático, y por ende, la capacidad de almacenamiento del acuífero subyacente. Esta combinación de recurso natural acuífero y azudes representaba un sistema con suficiente capacidad para regular y atenuar las secuencias climáticas extremas de la zona, garantizando un suministro hídrico resiliente, autónomo e independiente que satisfacía las necesidades básicas de todos los ecosistemas dependientes (Doncel Fuentes, 2015).

---

## CONCLUSIONES

La combinación de geo-historiografía, reconocimiento, inspección y topografía de campo interpretados bajo entorno GIS permiten reconstruir realidades pasadas cuyo funcionamiento puede ser refrendado con métodos actuales de simulación hidrodinámica. Esta metodología aporta un gran valor y utilidad en la estimación de impactos medioambientales pasados que permite diseñar propuestas resilientes y eficaces para mitigar eventos climáticos futuros.

En primer lugar, se ha demostrado la operación en cascada de los azudes y las potenciales interferencias entre ellos, existiendo cierta correlación entre tipología de diseño de azud y salto hidráulico disponible, indicando que aquellos de planta curva se situaron en los mejores emplazamientos. Así mismo, se ha estimado la capacidad de carga del sistema según las condiciones físicas circundantes, tipología de aprovechamiento y maquinaria hidráulica instalada.

El volumen de agua superficial capaz de almacenar este sistema,  $32 \text{ hm}^3$  en condiciones normales de operación y hasta  $47 \text{ hm}^3$  bajo condiciones estacionarias de avenida de 500 años de retorno, análogo a las que presenta el embalse del Vicario construido tras la desecación y aniquilación del sistema en la segunda mitad del siglo pasado. Ejemplo representativo de una política hidráulica añeja cuyos impactos están siendo analizados dentro del programa de investigación doctoral del autor principal.

En definitiva, podemos afirmar que este sistema de azudes en cascada se adaptó eficientemente al medio para constituir un auténtico atenuador de inundaciones, capaz de gestionar el recurso sobrante del vasto acuífero manchego y constituyó el centro industrial más importante de la región durante siglos. Aunque es cierto que hacia el s. XVI se hubiese sobrepasado la capacidad hidráulica del mismo, provocando disputas entre propietarios, no comprometía otros usos antrópicos del medio hídrico como pesquerías, recolección de vegetación silvestre, y por supuesto, paso sobre las aguas.

Estos usos tradicionales respetaban y preservaban la riqueza ecológica y el uso sostenible del medio natural, en sintonía con la actual Directiva Marco de Agua y las regulaciones propuestas para las reservas de la biosfera catalogadas por la UNESCO, cuyo objeto se puede resumir en garantizar cuantitativa y cualitativamente la disponibilidad hídrica a largo plazo, mitigar el avance de la desertización y los posibles impactos del cambio climático.

## REFERENCIAS

ACGE. (c. 1780). *Mapa del Río Guadiana desde el que suponen rebrote de sus aguas llamado los Ojos del Guadiana hasta la embocadura del Río Gígüela con demostración de las madres, canales y demás obras executadas de orden de S.M. para evacuar las inundaciones*. Archivo del Centro Geográfico del Ejército (ACGE), Madrid. Arm. E., T.8, C.4-238.

AHN. 2015. *Croquis del nacimiento del río Guadiana, y el paso por Daimiel, Ojos del Guadiana, Villarrubia de los Ojos hasta el término de Malagón (Ciudad Real)*. Retrieved from ES.45168.SNAHN/1.1.1.21//OSUNA,CP.10,D.24: <http://pares.mcu.es>

Almagro Vidal, C. 2016. *Paisajes medievales en el Campo de Calatrava*. Madrid: La Ergástula.

Bladé, E., Cea, L., Corestein, G., Escolano, E., Puertas, J., Vázquez-Cendón, M.,... Coll, A. 2014. Iber: herramienta de simulación numérica del flujo en ríos. *Revista Internacional de Métodos Numéricos para Cálculo y Diseño en Ingeniería*, 30, 1-10. <https://doi.org/10.1016/j.rimni.2012.07.004>

BOE. 2018. Real Decreto 849/1986, de 11 de abril. Reglamento del Dominio Público Hidráulico.

BOP Ciudad Real. (23 de 2 de 1987). Boletín Oficial de la Provincia de Ciudad Real. En Declaración provisional de sobreexplotación del Acuífero 23.

Campos, F.J., Sevilla, F.D. 2009. *Los pueblos de Ciudad Real en las Relaciones Topográficas de Felipe II*. Diputación de Ciudad Real.

Castro González, C.M. 1854. Apuntes sobre el río Guadiana y su nacimiento en los ojos. *Revista de Obras Públicas*, 4, tomo I, 106-114.

CEDEX. 2012. *Estudio de los impactos del cambio climático en los recursos hídricos y las masas de agua*. Madrid: Centro de Estudios Hidrográficos. CEDEX.

CEDEX. 2014. *Mapa de Caudales Máximos. Memoria Técnica. Ministerio de Fomento*. Ministerio de Medio Ambiente y Medio Rural y Marino.

CEGET. (1956-1957). *Archivo Cartográfico y de Estudios Geográficos del Centro Geográfico del Ejército*. Retrieved from USA Map Service, flight scale 1/32000: <https://fototeca.cnig.es/>

Celis Pozuelo, A., Mediavilla López, R., Santisteban Navarro, J.I., Castaño Castaño, S. 2019. La Monarquía Hispánica y el control de los recursos hídricos: hacia ladeseccación de Las Tablas de Daimiel de 1751. *Hispania*, vol. LXXIX, n.º 261, enero-abril, 69-98. <https://doi.org/10.3989/hispania.2019.003>

CHG. (21 de 03 de 2018). *Presas de embalse de la Cuenca Alta*. Obtenido de Confederación Hidrográfica del Guadiana: <http://www.chguadiana.es/cuenca-hidrografica/infraestructuras/infraestructuras-de-regulacion>

Chow, V. T. 1959. *Open-Channel Hydraulics*. McGraw-Hill.

- CIDAHM. (02 de 05 de 2018). *Banco de imágenes del Centro de Interpretación y Documentación del Agua y los Humedales Manchegos*. Concejalía de Medio Ambiente. Ayuntamiento de Daimiel.
- Dadson, T.J. 2007. *Los moriscos de Villarubia de los Ojos (Siglos XV-XVIII). Historia de una minoría asimilada, expulsada y reintegrada*. Iberoamericana.
- DGOP. 1883. Itinerarios del Río Guadiana. Dirección General Obras Públicas (DGOP). División Hidrológica Ciudad Real.
- Doncel Fuentes, P. 2015. *Towards Sustainable Use of Groundwater Resources: Acuífer 23, La Mancha-Spain*. Retrieved from KTH, School of Architecture and the Built Environment (ABE). Dissertation for Environmental Engineering and Sustainable Infrastructure MsC: <http://urn.kb.se/resolve?urn=urn:nbn:se:kth:diva-173875>
- Espinosa, D.C. 2015. La imagen más antigua de los molinos hidráulicos del Guadiana a su paso por Daimiel, a través de un plano conservado en la sección nobleza del Archivo Histórico Nacional. *V Congreso Internacional de Molinología*, (pp. 73-80). Alcázar de San Juan (Ciudad Real).
- Google Earth. 2016. Imagery Novembre 2016.
- Gray, D. 2005. *Braided river springs: distribution, benthic ecology, and role in the landscape*. University of Canterbury.
- Gumbel, E. 1958. *Statistics of extremes*. New York: Columbia University Press. <https://doi.org/10.7312/gumb92958>
- Hernández Pacheco, E. 1955. *Fisiografía Solar Hispano*. Madrid: Real Academia de Ciencias Exactas, Físicas y Naturales.
- ICOLD. 2011. Constitution Statuts. International Commission on Large Dams.
- ICOLD. (2017, 11). International Commission on Large Dams. Retrieved from Technology of dams: <https://www.icold-cigb.net>
- IGN<sup>®</sup>. 2008. Centro de descargas del Instituto Geográfico Nacional de España (IGN). MTN25 Raster.
- Ilera, F.A. 1993. Daimiel 1752: según las respuestas generales del Catastro de Ensenada.
- Intedhor SL. (28 de Diciembre de 2015). Campaña topográfica sin ánimo de lucro. Muestreo de 355 puntos singulares. G-3 RTK Topcon GPS. Precisión H: 10mm+1ppm; V: 15mm+1ppm. Los Ojos del Guadiana.
- Jérez García, O. 2005. La función didáctica de la arquitectura rural: Los molinos de los Ojos de Guadiana y las Tablas de Daimiel. In *Actas V Congreso Internacional del Molinología* (pp. 645-657). Alcázar de San Juan (Ciudad Real).
- Madoz, P. 1850. *Diccionario geográfico-estadístico-histórico de España y sus posesiones de Ultramar*. Madrid.
- MDT05-LIDAR; IGN<sup>®</sup>. 2009. Centro de descargas del Instituto Geográfico Nacional de España (IGN). PNOA. Modelo Digital del Terreno (MDT05-LIDAR) con densidad 0.5 ptos/m<sup>2</sup> y precisión altimétrica <0.5 m; LEICA ALS50; hojas 759, 760 y 761.
- Melero Cabañas, D. 2014. *Ciudad Real, Tierra de Molinos de Agua*. Ciudad Real: Imprenta Provincial.
- MTN25 Raster; IGN<sup>®</sup>. 2008. Centro de descargas del Instituto Geográfico Nacional de España (IGN). PNOA. Mapa topográfico nacional. Hojas 759, 760 y 761.
- PNOA; IGN<sup>®</sup>. (2006-2015). Centro de descargas del Instituto Geográfico Nacional de España (IGN). Plan Nacional de Ortofotografía Aérea. hojas 759, 760 y 761.
- Ruiz-Bellet, J.L., Balasch, J.C., Tuset, J., Barriendos, M., Mazon, J., Pino, D. 2015. Historical, hydraulic, hydrological and meteorological reconstruction of 1874 Santa Tecla flash floods in Catalonia (NE Iberian Peninsula). *Journal of Hydrology*, 524, 279-295. <https://doi.org/10.1016/j.jhydrol.2015.02.023>
- Santos, J.F., Campo, F.J. 2009. Territorio, Agua y Sociedad. Hacia un modelo de distribución de los molinos hidráulicos en el entorno de las tablas de Daimiel. *V Congreso Internacional de Molinología 2005*. Alcázar de San Juan.
- Sepúlveda Rodríguez, C. (22 de 03 de 2016). Inspección de campo a Los Ojos del Guadiana.

SIAA. 2018. Ministerio para la transición ecológica. Retrieved from Sistema de información del Anuario de Aforos. Redes de Seguimiento: <https://sig.mapama.gob.es/redes-seguimiento/>

Urbina, D., Urquijo, C. 2017. Arqueología en los Ojos del Guadiana. Los Toriles-Casas Altas. *ArqueoExperiences*. Edición digital.
